# Supplementary material
Source: publisher figshare collection journal article supplement (https://karger.figshare.com/articles/dataset/_/5620939)
Supplement: Supplementary file 1 [file 1]

**Supplement Figure 1**

Study design and follow-up

**Loss to follow-up:**

- 3-month: 6 Patients
- 1 year: 8 patients
- 5 years: 69 patients

***The second phase: 2013-2014***

- Door-to-door visit of the patients at their most recent address
- Checked with neighbors or relatives or any changes in contact numbers or address
- The list of all burials was reviewed in Khorasan Razavi province, the Bureau of Forensics database, and the Ministry of Health death records.
- Referral by family physicians, neurologists, outpatient clinics, nursing homes
- Invitation by television (once) and newspapers (twice)
- Using 982 community health volunteers for door to door screening
- Review of death certificates
- Review of the medical records of all patients admitted to the hospitals
- **Hospitals in study area:**

Ghaem, Imam Hossein, 17 Shahrivar, Hasheminejad

- **Hospitals outside the study area:**

Imam Reza, Farabi

Non-hospitalized patients (31.5%)

Hospitalized patients (63.5%)

Follow up

***The first phase: 2006-2012***

- Telephoned patients or their proxies
- The call was repeated up to three occasions the next day, the following week, and the week after.
- Face to face visit at office
- Visit severely disabled patients in their homes

***Study area:*** *Mashhad*, the second largest city in Iran (population⸟ 3 millions)

***Study population:*** residents of three distinct health area in Mashhad (population: 450,229)

Case Enrollment: November 21, 2006 – November 20, 2007

**Final stroke registration:**

- Total number of patients: n= 684
- First-ever Ischemic strokes: n=512

If unsuccessful
